# Supplementary material for: The Weight of Time: Experience of time toxicity among advanced cancer patients and their family caregivers: A qualitative study
Source: Research Square preprint supplement (doi:10.21203/rs.3.rs-6490205/v1), 2025-05-29
Supplement: Supplementary file 1 [file b5599e8fa50b98b3de03c87b.docx]

**Supplement2: Demographic Information Questionnaire**

This study strictly adheres to confidentiality protocols. All information provided will be solely utilized for data analysis in this research and will not be disclosed to third parties. Please answer all items truthfully and mark the appropriate options with a checkmark (√)

**For patients:**

Name：

contact information

1. Sex：□Male □Female
2. Age：
3. Marital status：□Married □Unmarried
4. Educational background：
5. Place of residence: □Urban □Rural
6. Work status：□ full-time □part-time □unemployment □retired
7. Travel time(from home to hospital): (minutes）
8. treatment cycle
9. Frequency of hospital admission （days）
10. Types of cancer
11. treatment method：□surgery □chemotherapy □radiotherapy □endocrinotherapy □targeted therapy □traditional Chinese medicine treatment □combined treatment
12. Family monthly earning：□＜1000Yuan □1000-3000Yuan □3000-5000Yuan □＞5000Yuan
13. pattern of payment：□ self-paying □public expense □health insurance □
14. Duration of illness（month）：
15. Whether to combine with other chronic diseases： □Yes （Note） □No

**For family caregivers**

Name：

contact information

1. Sex：Male Female
2. Age：
3. Marital status：Married Unmarried
4. Educational background：
5. Place of residence: Urban Rural
6. Work status： full-time part-time unemployment retired
7. Relationship with the Patient：□children □parents □couples □siblings □friend
8. The travel time from the arrival point to the patient's location： □＜30min □30-60min □60min
9. Travel time(from home to hospital): (minutes）
10. Frequency of hospital admission （days）
11. Types of cancer
12. treatment method： □surgery □chemotherapy □radiotherapy □endocrinotherapy □targeted therapy □ traditional Chinese medicine treatment □ combined treatment
13. Family monthly earning： □＜1000Yuan □1000-3000Yuan □3000-5000Yuan

□＞5000Yuan.
