# Supplementary material for: The Weight of Time: Experience of time toxicity among advanced cancer patients and their family caregivers: A qualitative study
Source: Research Square preprint supplement (doi:10.21203/rs.3.rs-6490205/v1), 2025-05-29
Supplement: Supplementary file 2 [file e7cf0d2d55e7df53684a7feb.docx]

**Supplement1: Interview guideline**

**For patients:**

1. **Introduction section**

- Patients were thanked for participating in this interview.
- Explain the purpose of the interview: to understand the views and feelings of patients on temporal toxicity during cancer treatment.
- Emphasize the confidentiality of the interview and obtain patients' consent.
- Interview atmosphere creation:

Ask the patient to briefly introduce himself/herself (eg：age, type of cancer, stage of treatment).

Ask if there is a particular treatment experience that the patient would like to share.

1. **Core interview guideline**

1. Since your first diagnosis, what do you think has taken you the most time?

2. During the treatment, have you ever felt that your time was "taken up too much by the treatment/something"?

What else is putting a time burden on you? What do you spend the most time on?

3. Do things that cost you time affect your life? Can you elaborate on what these include (eg: mood, work, treatment decisions, etc.)?

During treatment, did you ever feel that time was wasted or uncontrollable? Can you describe an example in detail?

Do you feel that your treatment takes time away from your family or friends? Here's an example.

4. How does the long treatment or waiting process affect your mood?

For example, did time constraints cause anxiety, frustration, or powerlessness?

Do you feel that time consumption is affecting your hopes or goals in life?

5. Can you give an example of how the duration and cost of treatment influenced your choice of treatment?

What advice was given to the medical team regarding the timing of treatment?

6. How do you cope with the time spent on these treatments and examinations?

7. What else do you think the medical team needs to adjust when arranging the treatment plan?

8. What advice would you give other patients to deal with "wasting time"?

**三、The end of the interview**

- Thank you for sharing.
- Briefly review the interview and ask patients if they have any additional comments or important items not mentioned.
- Inform that follow-up interview results may be provided by email or telephone.
- Thank you again and wish the patient all the best.

**For family caregivers:**

**一、Introduction section**

- caregivers were thanked for participating in this interview.
- Explain the purpose of the interview: to understand the views and feelings of caregivers on temporal toxicity during cancer treatment.
- Emphasize the confidentiality of the interview and obtain caregivers' consent.
- Interview atmosphere creation:

Ask the caregivers to briefly introduce patients (eg：age, type of cancer, stage of treatment).

Ask if there is a particular care experience that the caregivers would like to share.

**二、Core interview guideline**

1. Since the patient's diagnosis, what do you think has taken you the most time?

2. During the treatment, have you ever felt that your time was "taken up too much by the treatment/something"?

What else is putting a time burden on you? What do you spend the most time on?

3. Do things that cost you time affect your life? Can you elaborate on what these include (eg: mood, work, treatment decisions, etc.)?

During treatment, did you ever feel that time was wasted or uncontrollable? Can you describe an example in detail?

In the course of treatment, which thing makes you feel too much care time, seriously affecting your life

4. How does the long treatment or waiting process affect your mood?

For example, did time constraints cause anxiety, frustration, or powerlessness?

Do you feel that time consumption is affecting your hopes or goals in life?

5. Can you give an example of how the duration and cost of treatment influenced your choice of treatment?

What advice was given to the medical team regarding the timing of treatment?

6. How do you cope with the time spent on these treatments and examinations?

7. What else do you think the medical team needs to adjust when arranging the treatment plan?

8. What advice would you give other caregivers to deal with "wasting time"?

**三、The end of the interview**

- Thank you for sharing.
- Briefly review the interview and ask caregivers if they have any additional comments or important items not mentioned.
- Inform that follow-up interview results may be provided by email or telephone.
- Thank you again and wish the caregivers all the best.
